# Supplementary material for: Physicochemical properties of dietary phytochemicals can predict their passive absorption in the human small intestine
Source: PubMed Central journal article supplement (PMC5434065; doi:10.1038/s41598-017-01888-w), 2017-05-16
Supplement: 41598_2017_1888_MOESM1_ESM.pdf [file 41598_2017_1888_MOESM1_ESM.pdf]

# **Physicochemical properties of dietary phytochemicals can predict their passive absorption in the human small intestine**

**Sophie N.B. Selby-Pham<sup>1,2</sup>, Rosalind B. Miller<sup>3</sup>, Kate Howell<sup>1</sup>, Frank Dunshea<sup>1</sup> and Louise E. Bennett<sup>2,\*</sup>**

<sup>1</sup>Faculty of Veterinary and Agricultural Science, The University of Melbourne, Parkville, 3010, Australia

<sup>2</sup>CSIRO Agriculture and Food, 671 Sneydes Road, Werribee, 3030, Australia

<sup>3</sup>CSIRO Data61, North Ryde, 2113, Australia

\*Louise.Bennett@csiro.au

**S1 Table. The training dataset used for the development of the predictive model.**

| <b>Phytochemical</b>            | <b>M<sub>r</sub><sup>*</sup></b> | <b>LogP<sup>*</sup></b> | <b>PSA<sup>*</sup></b><br>(Å <sup>2</sup> ) | <b>No. freely rotatable bonds<sup>*</sup></b> | <b>No. H acceptor<sup>*</sup></b> | <b>No. H donor<sup>*</sup></b> | <b>Molecular volume<sup>*</sup></b><br>(Å <sup>3</sup> ) | <b>Intake<sup>#</sup></b>                               | <b>T<sub>max</sub><sup>#</sup> (h)</b><br>(mean ± SE) | <b>Reference #</b> |
|---------------------------------|----------------------------------|-------------------------|---------------------------------------------|-----------------------------------------------|-----------------------------------|--------------------------------|----------------------------------------------------------|---------------------------------------------------------|-------------------------------------------------------|--------------------|
| <i>Anthocyanins</i>             |                                  |                         |                                             |                                               |                                   |                                |                                                          |                                                         |                                                       |                    |
| Cyanidin 3-O-arabinoside        | 419.36                           | -1.627                  | 171.234                                     | 4                                             | 10                                | 7                              | 342.085                                                  | solid (extract)                                         | 3.5 ± 0.5                                             | 31                 |
| Cyanidin 3-O-galactoside        | 449.38                           | -2.793                  | 191.462                                     | 4                                             | 11                                | 8                              | 366.931                                                  | solid (extract)                                         | 2.5 ± 0.5                                             | 31                 |
| Cyanidin 3-O-glucoside          | 449.38                           | -2.793                  | 191.462                                     | 4                                             | 11                                | 8                              | 366.931                                                  | liquid (juice)                                          | 0.5                                                   | 54                 |
| Cyanidin 3-O-glucoside          | 449.38                           | -2.793                  | 191.462                                     | 4                                             | 11                                | 8                              | 366.931                                                  | semi-solid (freeze-dried whole fruit made into a paste) | 1.09 ± 0.3                                            | 52                 |
| Cyanidin 3-O-glucoside          | 449.38                           | -2.793                  | 191.462                                     | 4                                             | 11                                | 8                              | 366.931                                                  | liquid (juice)                                          | 1                                                     | 49                 |
| Cyanidin 3-O-rutinoside         | 595.53                           | -3.492                  | 250.386                                     | 6                                             | 15                                | 10                             | 490.793                                                  | semi-solid (freeze-dried whole fruit made into a paste) | 1.64 ± 0.5                                            | 52                 |
| Cyanidin 3-O-rutinoside         | 595.53                           | -3.492                  | 250.386                                     | 6                                             | 15                                | 10                             | 490.793                                                  | liquid (juice)                                          | 1                                                     | 49                 |
| Cyanidin 3-O-sambubioside       | 581.50                           | -4.071                  | 250.386                                     | 6                                             | 15                                | 10                             | 474.206                                                  | semi-solid (freeze-dried whole fruit made into a paste) | 2.18 ± 1.54                                           | 52                 |
| Cyanidin 3-O-xylosyl-rutinoside | 727.65                           | -4.572                  | 309.31                                      | 8                                             | 19                                | 12                             | 598.069                                                  | semi-solid (freeze-dried whole fruit made into a paste) | 2.55 ± 0.169                                          | 52                 |

|                                  |        |        |         |   |    |    |         |                                   |             |    |
|----------------------------------|--------|--------|---------|---|----|----|---------|-----------------------------------|-------------|----|
| Delphinidin 3-O-glucoside        | 465.39 | -3.084 | 211.69  | 4 | 12 | 9  | 374.948 | liquid (juice)                    | 1           | 49 |
| Delphinidin 3-O-rutinoside       | 611.53 | -3.783 | 270.614 | 6 | 16 | 11 | 498.811 | liquid (juice)                    | 1           | 49 |
| Malvidin 3-O-glucoside           | 493.44 | -2.469 | 189.702 | 6 | 12 | 7  | 410.004 | semi-solid (extract with yoghurt) | 1.8 ± 0.6   | 36 |
| Peonidin 3-O-glucoside           | 463.42 | -2.486 | 180.468 | 5 | 11 | 7  | 384.458 | semi-solid (extract with yoghurt) | 1.4 ± 0.8   | 36 |
| <b>Flavanols</b>                 |        |        |         |   |    |    |         |                                   |             |    |
| (-)-Epicatechin 3-O-gallate      | 442.37 | 2.537  | 177.135 | 4 | 10 | 7  | 359.554 | liquid (drink)                    | 1.6 ± 0.2   | 18 |
| (-)-Epigallocatechin 3-O-gallate | 458.37 | 2.245  | 197.363 | 4 | 11 | 8  | 367.571 | liquid (drink)                    | 1.9 ± 0.1   | 18 |
| (-)-Epigallocatechin 3-O-gallate | 458.37 | 2.245  | 197.363 | 4 | 11 | 8  | 367.571 | liquid (drink)                    | 1.4 ± 0.6   | 34 |
| <b>Flavonols</b>                 |        |        |         |   |    |    |         |                                   |             |    |
| Isorhamnetin 3-O-glucuronide     | 492.39 | -0.179 | 216.58  | 5 | 13 | 7  | 391.915 | semi-solid (fried red onions)     | 0.6 ± 0.1   | 42 |
| Quercetin aglycone               | 302.24 | 1.683  | 131.351 | 1 | 7  | 5  | 240.084 | solid (pure compound)             | 3 ± 2       | 41 |
| Quercetin 3-O-glucuronide        | 478.36 | -0.487 | 227.574 | 4 | 13 | 8  | 374.387 | semi-solid (fried red onions)     | 0.6 ± 0.1   | 42 |
| Quercetin 3'-O-sulfate           | 381.29 | -1.809 | 177.556 | 3 | 10 | 4  | 277.758 | semi-solid (fried red onions)     | 0.75 ± 0.12 | 42 |
| <b>Hydroxybenzoic acids</b>      |        |        |         |   |    |    |         |                                   |             |    |

|                                                      |        |        |         |   |    |   |         |                                                                  |                |    |
|------------------------------------------------------|--------|--------|---------|---|----|---|---------|------------------------------------------------------------------|----------------|----|
| Ellagic acid                                         | 302.19 | 0.943  | 141.334 | 0 | 8  | 4 | 221.776 | liquid<br>(juice)                                                | 0.65 ±<br>0.23 | 21 |
| Ellagic acid                                         | 302.19 | 0.943  | 141.334 | 0 | 8  | 4 | 221.776 | liquid<br>(extract drink)                                        | 0.94 ±<br>0.06 | 21 |
| Ellagic acid                                         | 302.19 | 0.943  | 141.334 | 0 | 8  | 4 | 221.776 | solid<br>(extract)                                               | 2.58 ±<br>0.42 | 21 |
| Ellagic acid                                         | 302.19 | 0.943  | 141.334 | 0 | 8  | 4 | 221.776 | semi-solid<br>(freeze-dried whole<br>fruit made into a<br>paste) | 1.98 ±<br>2.87 | 52 |
| Ellagic acid                                         | 302.19 | 0.943  | 141.334 | 0 | 8  | 4 | 221.776 | solid<br>(extract)                                               | 1              | 40 |
| Ellagic acid                                         | 302.19 | 0.943  | 141.334 | 0 | 8  | 4 | 221.776 | liquid<br>(juice)                                                | 0.98 ±<br>0.06 | 50 |
| <b><i>Hydroxycinnamic acids</i></b>                  |        |        |         |   |    |   |         |                                                                  |                |    |
| 5-O-<br>Caffeoylquinic<br>acid                       | 354.31 | -0.453 | 164.744 | 5 | 9  | 6 | 289.267 | liquid<br>(drink)                                                | 1 ± 0.2        | 51 |
| 3-O-<br>caffeoylquinic<br>acid lactone-O-<br>sulfate | 415.35 | -4.212 | 179.727 | 6 | 11 | 3 | 316.048 | liquid<br>(drink)                                                | 0.6 ± 0.1      | 51 |
| 4-O-<br>caffeoylquinic<br>acid lactone-O-<br>sulfate | 415.35 | -4.375 | 179.727 | 6 | 11 | 3 | 316.048 | liquid<br>(drink)                                                | 0.7 ± 0.1      | 51 |
| 3-O-<br>Feruloylquinic<br>acid                       | 368.34 | -0.145 | 153.75  | 6 | 9  | 5 | 313.795 | liquid<br>(drink)                                                | 0.7 ± 0.1      | 51 |

|                           |        |        |        |    |   |   |         |                                        |             |    |
|---------------------------|--------|--------|--------|----|---|---|---------|----------------------------------------|-------------|----|
| 4-O-Feruloylquinic acid   | 368.34 | -0.363 | 153.75 | 6  | 9 | 5 | 313.795 | liquid (drink)                         | 0.8 ± 0.1   | 51 |
| 5-O-Feruloylquinic acid   | 368.34 | -0.145 | 153.75 | 6  | 9 | 5 | 313.795 | liquid (drink)                         | 0.9 ± 0.1   | 51 |
| <b><i>Stilbenes</i></b>   |        |        |        |    |   |   |         |                                        |             |    |
| trans-Resveratrol         | 228.24 | 2.986  | 60.684 | 2  | 3 | 3 | 206.922 | solid (pure compound)                  | 0.833       | 32 |
| trans-Resveratrol         | 228.24 | 2.986  | 60.684 | 2  | 3 | 3 | 206.922 | solid (pure compound)                  | 0.759       | 32 |
| trans-Resveratrol         | 228.24 | 2.986  | 60.684 | 2  | 3 | 3 | 206.922 | solid (pure compound)                  | 1.375       | 32 |
| trans-Resveratrol         | 228.24 | 2.986  | 60.684 | 2  | 3 | 3 | 206.922 | solid (pure compound)                  | 1.5         | 32 |
| <b><i>Carotenoids</i></b> |        |        |        |    |   |   |         |                                        |             |    |
| Lycopene                  | 536.89 | 9.977  | 0      | 16 | 0 | 0 | 601.871 | liquid (drink)                         | 16.6 ± 10.1 | 19 |
| Lycopene                  | 536.89 | 9.977  | 0      | 16 | 0 | 0 | 601.871 | liquid (drink)                         | 19.8 ± 12.4 | 19 |
| Lycopene                  | 536.89 | 9.977  | 0      | 16 | 0 | 0 | 601.871 | liquid (drink)                         | 15.6 ± 13.8 | 19 |
| Lycopene                  | 536.89 | 9.977  | 0      | 16 | 0 | 0 | 601.871 | liquid (drink)                         | 26.1 ± 5.5  | 19 |
| Lycopene                  | 536.89 | 9.977  | 0      | 16 | 0 | 0 | 601.871 | liquid (drink)                         | 32.6 ± 18.6 | 19 |
| β-Carotene                | 536.89 | 9.843  | 0      | 10 | 0 | 0 | 591.964 | semi-solid (pure compound in emulsion) | 5           | 47 |
| β-Carotene                | 536.89 | 9.843  | 0      | 10 | 0 | 0 | 591.964 | liquid (drink)                         | 5           | 46 |

|                              |        |        |         |    |    |   |         |                               |                |    |
|------------------------------|--------|--------|---------|----|----|---|---------|-------------------------------|----------------|----|
| Astaxanthin                  | 596.85 | 8.596  | 74.598  | 10 | 4  | 2 | 612.415 | solid<br>(pure compound)      | 8 ± 0          | 44 |
| Astaxanthin                  | 596.85 | 8.596  | 74.598  | 10 | 4  | 2 | 612.415 | liquid<br>(drink)             | 6.7 ± 1.2      | 45 |
| Canthaxanthin                | 564.85 | 9.293  | 34.142  | 10 | 2  | 0 | 596.328 | liquid<br>(drink)             | 12             | 46 |
| <i>all-E-Zeaxanthin</i>      | 568.89 | 9.39   | 40.456  | 10 | 2  | 2 | 608.052 | solid<br>(pure compound)      | 15.2 ±<br>7.6  | 37 |
| <i>all-E-Zeaxanthin</i>      | 568.89 | 9.39   | 40.456  | 10 | 2  | 2 | 608.052 | solid<br>(pure compound)      | 14.7 ±<br>0.9  | 37 |
| Lutein                       | 568.89 | 9.307  | 40.456  | 10 | 2  | 2 | 608.077 | semi-solid<br>(pure compound) | 14.8 ±<br>2.5  | 55 |
| <b><i>Vitamins</i></b>       |        |        |         |    |    |   |         |                               |                |    |
| Vitamin C<br>(ascorbic acid) | 176.12 | -1.402 | 107.22  | 2  | 6  | 4 | 139.71  | solid<br>(pure compound)      | 2.76 ±<br>0.62 | 24 |
| Vitamin B1<br>(thiamine)     | 265.36 | -3.449 | 75.92   | 4  | 5  | 3 | 239.76  | liquid<br>(pure compound)     | 0.88           | 53 |
| Vitamin B1<br>(thiamine)     | 265.36 | -3.449 | 75.92   | 4  | 5  | 3 | 239.76  | solid<br>(pure compound)      | 2.34 ±<br>0.89 | 39 |
| Vitamin B2<br>(riboflavin)   | 376.40 | -0.759 | 161.563 | 5  | 10 | 5 | 321.314 | solid<br>(pure compound)      | 1.5            | 57 |
| Vitamin B2<br>(riboflavin)   | 376.40 | -0.759 | 161.563 | 5  | 10 | 5 | 321.314 | solid<br>(pure compound)      | 1.4            | 57 |
| Vitamin B2<br>(riboflavin)   | 376.40 | -0.759 | 161.563 | 5  | 10 | 5 | 321.314 | solid<br>(pure compound)      | 2              | 57 |
| Nicotiamide                  | 122.13 | -0.48  | 55.986  | 1  | 3  | 2 | 110.159 | liquid<br>(pure compound)     | 0.3 ± 0.1      | 48 |
| Nicotiamide                  | 122.13 | -0.48  | 55.986  | 1  | 3  | 2 | 110.159 | liquid<br>(pure compound)     | 0.5 ± 0.3      | 48 |
| Nicotiamide                  | 122.13 | -0.48  | 55.986  | 1  | 3  | 2 | 110.159 | solid<br>(pure compound)      | 1 ± 0.8        | 48 |

|                                         |         |        |         |    |    |    |          |                            |                |    |
|-----------------------------------------|---------|--------|---------|----|----|----|----------|----------------------------|----------------|----|
| Nicotiamide                             | 122.13  | -0.48  | 55.986  | 1  | 3  | 2  | 110.159  | solid<br>(pure compound)   | 1.9 ± 1.2      | 48 |
| Nicotinic acid                          | 123.11  | 0.273  | 50.191  | 1  | 3  | 1  | 106.888  | solid<br>(pure compound)   | 2.1 ± 1.6      | 38 |
| Nicotinuric acid                        | 180.16  | -1.773 | 79.289  | 3  | 5  | 2  | 155.076  | solid<br>(pure compound)   | 2.8 ± 1.4      | 38 |
| Cobalamin<br>(vitamin B12)              | 1270.44 | -2.137 | 464.966 | 26 | 27 | 15 | 1146.798 | solid<br>(pure compound)   | 6.83 ±<br>3.19 | 33 |
| <i>R,R,R</i> - $\alpha$ -<br>Tocopherol | 430.72  | 9.043  | 29.462  | 12 | 2  | 1  | 474.499  | solid<br>(pure compound)   | 13.5 ±<br>1.4  | 35 |
| $\alpha$ -Tocotrienol                   | 424.67  | 9.089  | 29.462  | 9  | 2  | 1  | 455.861  | solid<br>(pure compound)   | 4.3 ± 0.7      | 56 |
| $\gamma$ -Tocotrienol                   | 410.64  | 9.03   | 29.462  | 9  | 2  | 1  | 439.3    | solid<br>(pure compound)   | 4.3 ± 0.7      | 56 |
| $\delta$ -Tocotrienol                   | 396.62  | 8.671  | 29.462  | 9  | 2  | 1  | 422.739  | solid<br>(pure compound)   | 3 ± 0.4        | 56 |
| Phylloquinone<br>(vitamin K)            | 450.71  | 8.803  | 34.142  | 14 | 2  | 0  | 483.869  | solid<br>(whole vegetable) | 8              | 43 |

\* calculated using the Molinspiration Chemoinformatics calculator

# collected from the literature

**S2 Table. The PCv dataset for validation of the predictive model.**

| Family               | Phyto-chemical           | Source <sup>#</sup>     | LogP <sup>*</sup> | M <sub>r</sub> <sup>*</sup> | PSA <sup>*</sup><br>(Å <sup>2</sup> ) | Predicted<br>T <sub>max</sub><br>LogP <sup>**</sup><br>(h) | Predicted<br>T <sub>max</sub><br>PSA <sup>**</sup><br>(h) | Measured<br>T <sub>max</sub> <sup>#</sup> (h) |      |    | Reference <sup>#</sup> |
|----------------------|--------------------------|-------------------------|-------------------|-----------------------------|---------------------------------------|------------------------------------------------------------|-----------------------------------------------------------|-----------------------------------------------|------|----|------------------------|
|                      |                          |                         |                   |                             |                                       |                                                            |                                                           | Mean                                          | SE   | N  |                        |
| <i>Liquid intake</i> |                          |                         |                   |                             |                                       |                                                            |                                                           |                                               |      |    |                        |
| Anthocyanins         | Cyanidin 3-O-arabinoside | Cranberry (juice)       | -1.63             | 419.36                      | 171.23                                | 0.70                                                       | 1.55                                                      | 3.30                                          | 1.17 | 10 | 76                     |
|                      | Cyanidin 3-O-arabinoside | Cranberry (juice)       | -1.63             | 419.36                      | 171.23                                | 0.70                                                       | 1.55                                                      | 1.47                                          | 0.17 | 15 | 78                     |
|                      | Cyanidin 3-O-galactoside | Cranberry (juice)       | -2.79             | 449.39                      | 191.46                                | 0.65                                                       | 1.59                                                      | 1.27                                          | 0.15 | 15 | 78                     |
|                      | Cyanidin 3-O-galactoside | Cranberry (juice)       | -2.79             | 449.39                      | 191.46                                | 0.65                                                       | 1.59                                                      | 2.30                                          | 1.01 | 10 | 76                     |
|                      | Cyanidin 3-O-glucoside   | Acai berry (juice)      | -2.79             | 449.39                      | 191.46                                | 0.65                                                       | 1.59                                                      | 2.00                                          | 0.22 | 12 | 77                     |
|                      | Cyanidin 3-O-glucoside   | Black currant (extract) | -2.79             | 449.39                      | 191.46                                | 0.65                                                       | 1.59                                                      | 1.25                                          | 0.16 | 8  | 75                     |
|                      | Cyanidin 3-O-glucoside   | Elderberry (extract)    | -2.79             | 449.39                      | 191.46                                | 0.65                                                       | 1.59                                                      | 1.08                                          | 0.34 | 4  | 62                     |
|                      | Cyanidin 3-O-glucoside   | Cranberry (juice)       | -2.79             | 449.39                      | 191.46                                | 0.65                                                       | 1.59                                                      | 1.13                                          | 0.21 | 15 | 78                     |
|                      | Cyanidin 3-O-glucoside   | Red grape (juice)       | -2.79             | 449.39                      | 191.46                                | 0.65                                                       | 1.59                                                      | 0.50                                          | 0.07 | 9  | 66                     |
|                      | Cyanidin 3-O-glucoside   | Red grape and blueberry | -2.79             | 449.39                      | 191.46                                | 0.65                                                       | 1.59                                                      | 0.92                                          | 0.12 | 10 | 73                     |
|                      | Cyanidin 3-O-glucoside   | Cranberry (juice)       | -2.79             | 449.39                      | 191.46                                | 0.65                                                       | 1.59                                                      | 1.70                                          | 0.19 | 10 | 76                     |
|                      | Cyanidin 3-O-rutinoside  | Black currant (extract) | -3.49             | 595.53                      | 250.39                                | 0.80                                                       | 2.60                                                      | 1.50                                          | 0.19 | 8  | 75                     |



|                              |                                 |       |        |        |      |      |      |      |    |    |
|------------------------------|---------------------------------|-------|--------|--------|------|------|------|------|----|----|
| Cyanidin 3-O-sambubioside    | Elderberry (extract)            | -4.07 | 581.5  | 250.39 | 0.74 | 2.36 | 1.19 | 0.28 | 4  | 62 |
| Cyanidin 3-O-sambubioside    | Hibiscus (extract)              | -4.07 | 581.5  | 250.39 | 0.74 | 2.36 | 1.25 | 0.06 | 6  | 67 |
| Delphinidin 3-O-glucoside    | Red grape (juice)               | -3.08 | 465.39 | 211.69 | 0.65 | 1.48 | 1.40 | 0.40 | 8  | 88 |
| Delphinidin 3-O-glucoside    | Red grape (juice)               | -3.08 | 465.39 | 211.69 | 0.65 | 1.48 | 0.63 | 0.08 | 9  | 66 |
| Delphinidin 3-O-glucoside    | Red grape and blueberry (juice) | -3.08 | 465.39 | 211.69 | 0.65 | 1.48 | 0.97 | 0.08 | 10 | 73 |
| Delphinidin 3-O-glucoside    | Black currant (extract)         | -3.08 | 465.39 | 211.69 | 0.65 | 1.48 | 1.50 | 0.19 | 8  | 75 |
| Delphinidin 3-O-rutinoside   | Black currant (extract)         | -3.08 | 465.39 | 211.69 | 0.81 | 2.43 | 1.75 | 0.37 | 8  | 75 |
| Delphinidin 3-O-sambubioside | Hibiscus (extract)              | -4.31 | 597.5  | 270.61 | 0.75 | 2.20 | 1.38 | 0.20 | 6  | 67 |
| Malvidin 3-O-glucoside       | Cranberry (juice)               | -2.47 | 493.44 | 189.7  | 0.73 | 2.20 | 0.93 | 0.28 | 15 | 78 |
| Malvidin 3-O-glucoside       | Red grape (juice)               | -2.47 | 493.44 | 189.7  | 0.73 | 2.20 | 0.63 | 0.08 | 9  | 66 |
| Malvidin 3-O-glucoside       | Red grape (juice)               | -2.47 | 493.44 | 189.7  | 0.73 | 2.20 | 1.38 | 0.08 | 9  | 66 |
| Malvidin 3-O-glucoside       | Red grape and blueberry (juice) | -2.47 | 493.44 | 189.7  | 0.73 | 2.20 | 1.13 | 0.13 | 10 | 73 |
| Peonidin 3-O-arabinoside     | Cranberry (juice)               | -1.32 | 433.39 | 160.24 | 0.75 | 1.88 | 0.90 | 0.16 | 10 | 76 |
| Peonidin 3-O-arabinoside     | Cranberry (juice)               | -1.32 | 433.39 | 160.24 | 0.75 | 1.88 | 1.27 | 0.15 | 15 | 78 |
| Peonidin 3-O-galactoside     | Cranberry (juice)               | -2.49 | 463.42 | 180.47 | 0.69 | 1.94 | 1.47 | 0.17 | 15 | 78 |
| Peonidin 3-O-galactoside     | Cranberry (juice)               | -2.49 | 463.42 | 180.47 | 0.69 | 1.94 | 1.60 | 0.82 | 10 | 76 |

|           |                          |                                 |       |        |        |      |      |      |      |    |    |
|-----------|--------------------------|---------------------------------|-------|--------|--------|------|------|------|------|----|----|
|           | Peonidin 3-O-glucoside   | Red grape (juice)               | -2.49 | 463.42 | 180.47 | 0.69 | 1.94 | 0.50 | 0.07 | 9  | 66 |
|           | Peonidin 3-O-glucoside   | Cranberry (juice)               | -2.49 | 463.42 | 180.47 | 0.69 | 1.94 | 1.40 | 0.21 | 15 | 78 |
|           | Peonidin 3-O-glucoside   | Red wine (drink)                | -2.49 | 463.42 | 180.47 | 0.69 | 1.94 | 1.38 | 0.08 | 9  | 66 |
|           | Peonidin 3-O-glucoside   | Red grape and blueberry (juice) | -2.49 | 463.42 | 180.47 | 0.69 | 1.94 | 0.92 | 0.05 | 10 | 73 |
|           | Peonidin 3-O-glucoside   | Cranberry (juice)               | -2.49 | 463.42 | 180.47 | 0.69 | 1.94 | 4.70 | 3.00 | 10 | 76 |
|           | Petunidin 3-O-glucoside  | Red wine (drink)                | -2.78 | 479.41 | 200.7  | 0.69 | 1.94 | 1.25 | 0.05 | 9  | 66 |
|           | Petunidin 3-O-glucoside  | Red grape (juice)               | -2.78 | 479.41 | 200.7  | 0.69 | 1.81 | 0.50 | 0.07 | 9  | 66 |
|           | Petunidin 3-O-glucoside  | Red grape and blueberry (juice) | -2.78 | 479.41 | 200.7  | 0.69 | 1.81 | 1.15 | 0.08 | 10 | 73 |
|           | Petunidin 3-O-glucoside  | Red grape (juice)               | -2.78 | 479.41 | 200.7  | 0.69 | 1.81 | 1.30 | 0.5  | 8  | 88 |
| Flavanols | Epicatechin              | Pure compound                   | 1.37  | 290.27 | 110.37 | 0.85 | 1.08 | 1.00 | 0.50 | 9  | 59 |
|           | Epicatechin              | Cranberry (juice)               | 1.37  | 290.27 | 110.37 | 0.85 | 1.08 | 2.60 | 0.76 | 10 | 76 |
|           | Epicatechin              | Cocoa (drink)                   | 1.37  | 290.27 | 110.37 | 0.85 | 1.08 | 2.00 | NA   | 6  | 89 |
|           | Epicatechin              | Green tea (drink)               | 1.37  | 290.27 | 110.37 | 0.85 | 1.08 | 0.78 | 0.19 | 12 | 82 |
|           | Epicatechin and catechin | Cocoa (drink)                   | 1.37  | 290.27 | 110.37 | 0.85 | 1.08 | 1.50 | NA   | 6  | 84 |
|           | Epicatechin gallate      | Green tea (drink)               | 2.54  | 442.38 | 177.13 | 1.44 | 1.72 | 1.00 | 0.30 | 5  | 87 |
|           | Epigallocatechin         | Green tea (drink)               | 1.08  | 306.27 | 130.6  | 0.84 | 1.01 | 0.72 | 0.12 | 12 | 82 |

|                        |                          |                                 |      |        |        |      |      |      |      |    |    |
|------------------------|--------------------------|---------------------------------|------|--------|--------|------|------|------|------|----|----|
|                        | Epigallocatechin         | Green tea (drink)               | 1.08 | 306.27 | 130.6  | 0.84 | 1.01 | 0.50 | 0.00 | 5  | 87 |
|                        | Epigallocatechin gallate | Green tea (drink)               | 2.25 | 458.38 | 197.36 | 1.40 | 1.61 | 1.69 | 0.50 | 12 | 82 |
|                        | Epigallocatechin gallate | Green tea (drink)               | 2.25 | 458.38 | 197.36 | 1.40 | 1.61 | 0.60 | 0.10 | 5  | 87 |
|                        | Procyanidin B2 dimer     | Cocoa (drink)                   | 2.58 | 578.53 | 220.75 | 1.90 | 3.02 | 2.00 | NA   | 6  | 89 |
| Flavonols              | Myricetin                | Cranberry (juice)               | 1.39 | 318.24 | 151.58 | 0.91 | 0.91 | 1.70 | 0.41 | 10 | 76 |
|                        | Quercetin                | Cranberry (juice)               | 1.68 | 302.24 | 131.35 | 0.92 | 0.97 | 1.40 | 0.41 | 10 | 76 |
| Hydroxy-benzoic acids  | 4-Hydroxybenzoic acid    | Cranberry (juice)               | 1.37 | 138.12 | 57.53  | 0.63 | 0.60 | 0.80 | 0.22 | 10 | 76 |
|                        | Protocatechuic acid      | Montmorency tart cherry (juice) | 0.88 | 154.12 | 77.75  | 0.60 | 0.56 | 1.00 | NA   | 12 | 71 |
|                        | Protocatechuic acid      | Montmorency tart cherry (juice) | 0.88 | 154.12 | 77.75  | 0.60 | 0.56 | 1.00 | NA   | 12 | 71 |
|                        | Vanillic acid            | Cranberry (juice)               | 1.19 | 168.15 | 66.76  | 0.65 | 0.68 | 0.70 | 0.09 | 10 | 76 |
|                        | Vanillic acid            | Montmorency tart cherry (juice) | 1.19 | 168.15 | 66.76  | 0.65 | 0.68 | 2.00 | NA   | 12 | 71 |
|                        | Vanillic acid            | Montmorency tart cherry (juice) | 1.19 | 168.15 | 66.76  | 0.65 | 0.68 | 1.00 | NA   | 12 | 71 |
| Hydroxy-cinnamic acids | Caffeic acid             | Cranberry (juice)               | 0.94 | 180.16 | 77.75  | 0.64 | 0.67 | 0.80 | 0.16 | 10 | 76 |
|                        | Ferulic acid             | Cranberry (juice)               | 1.25 | 194.19 | 66.76  | 0.69 | 0.82 | 0.60 | 0.09 | 10 | 76 |
|                        | p-Coumaric acid          | Cranberry (juice)               | 1.43 | 164.16 | 57.53  | 0.67 | 0.72 | 0.60 | 0.09 | 10 | 76 |
|                        | Sinapic acid             | Cranberry (juice)               | 1.26 | 224.21 | 76     | 0.73 | 0.93 | 0.60 | 0.16 | 10 | 76 |

|                                 |                                                                 |                           |       |        |        |       |       |       |      |    |    |
|---------------------------------|-----------------------------------------------------------------|---------------------------|-------|--------|--------|-------|-------|-------|------|----|----|
| Hydroxy-phenylacetic acids      | 3,4-Dihydroxy-phenylacetic acid                                 | Cranberry (juice)         | 0.39  | 168.15 | 77.75  | 0.57  | 0.62  | 0.80  | 0.22 | 10 | 76 |
| Stilbenes                       | <i>cis</i> -Piceid ( <i>cis</i> -Resveratrol 3-O-glucoside)     | Red wine (drink)          | 1.2   | 390.39 | 139.84 | 1.01  | 1.67  | 1.13  | 0.15 | 10 | 83 |
|                                 | <i>trans</i> -Piceid ( <i>trans</i> -Resveratrol 3-O-glucoside) | Red wine (drink)          | 1.2   | 390.39 | 139.84 | 1.01  | 1.67  | 0.86  | 0.19 | 10 | 83 |
| Carotenoids                     | $\beta$ -Carotene                                               | Pure compound             | 9.843 | 536.89 | 0      | 11.12 | 16.43 | 7.00  | 0.83 | 8  | 72 |
|                                 | Fucoxanthinol                                                   | Kombu (extract)           | 8.49  | 658.92 | 96.36  | 9.44  | 16.22 | 4.00  | NA   | 18 | 69 |
|                                 | Lutein                                                          | Marigold flower (extract) | 9.307 | 568.89 | 40.46  | 10.05 | 14.28 | 19.00 | 2.05 | 8  | 72 |
|                                 | Lycopene                                                        | Tomato (drink)            | 9.977 | 536.89 | 0      | 11.59 | 16.43 | 5.00  | NA   | 5  | 65 |
|                                 | Lycopene                                                        | Tomato (drink)            | 9.977 | 536.89 | 0      | 11.59 | 16.43 | 5.00  | NA   | 5  | 65 |
|                                 | Lycopene                                                        | Tomato (drink)            | 9.977 | 536.89 | 0      | 11.59 | 16.43 | 5.00  | NA   | 5  | 65 |
|                                 | Lycopene                                                        | Tomato (drink)            | 9.977 | 536.89 | 0      | 11.59 | 16.43 | 5.00  | NA   | 5  | 65 |
| <b><i>Semi-solid intake</i></b> |                                                                 |                           |       |        |        |       |       |       |      |    |    |
| Anthocyanins                    | Cyanidin 3-O-glucoside                                          | Acai berry (pulp)         | -2.79 | 449.39 | 191.46 | 1.15  | 1.11  | 2.17  | 0.11 | 12 | 77 |

|                            |                                 |                                           |       |        |        |      |      |      |      |    |    |
|----------------------------|---------------------------------|-------------------------------------------|-------|--------|--------|------|------|------|------|----|----|
|                            | Cyanidin 3-O-glucoside          | Red grape and blueberry (juice and puree) | -2.79 | 449.39 | 191.46 | 1.15 | 1.11 | 1.13 | 0.13 | 10 | 73 |
|                            | Cyanidin 3-O-glucoside          | Raspberry (homogenised whole fruit)       | -2.79 | 449.39 | 191.46 | 1.15 | 1.11 | 1.00 | NA   | 10 | 74 |
|                            | Cyanidin 3-O-glucosylrutinoside | Montmorency tart cherry (whole fruit)     | -4.79 | 757.67 | 329.54 | 2.91 | 3.91 | 2.00 | NA   | 12 | 85 |
|                            | Cyanidin 3-O-glucosylrutinoside | Montmorency tart cherry (whole fruit)     | -4.79 | 757.67 | 329.54 | 2.91 | 3.91 | 4.00 | NA   | 12 | 85 |
|                            | Cyanidin 3-O-rutinoside         | Montmorency tart cherry (whole fruit)     | -3.49 | 595.53 | 250.39 | 1.52 | 2.17 | 1.50 | NA   | 12 | 85 |
|                            | Cyanidin 3-O-rutinoside         | Montmorency tart cherry (whole fruit)     | -3.49 | 595.53 | 250.39 | 1.52 | 2.17 | 2.00 | NA   | 12 | 85 |
|                            | Delphinidin 3-O-glucoside       | Red grape and blueberry (juice and puree) | -3.08 | 465.39 | 211.69 | 1.29 | 1.03 | 1.12 | 0.13 | 10 | 73 |
|                            | Malvidin 3-O-glucoside          | Red grape and blueberry (juice and puree) | -2.47 | 493.44 | 189.7  | 1.03 | 1.69 | 1.25 | 0.13 | 10 | 73 |
|                            | Peonidin 3-O-glucoside          | Red grape and blueberry (juice and puree) | -2.49 | 463.42 | 180.47 | 1.03 | 1.43 | 1.15 | 0.10 | 10 | 73 |
|                            | Petunidin 3-O-glucoside         | Red grape and blueberry (juice and puree) | -2.49 | 463.42 | 180.47 | 1.15 | 1.32 | 1.18 | 0.17 | 10 | 73 |
| Vitamins                   | Ascorbic acid                   | Kiwi fruit (whole fruit)                  | -1.4  | 176.12 | 107.22 | 0.75 | 0.24 | 2.00 | NA   | 9  | 63 |
| <b><i>Solid intake</i></b> |                                 |                                           |       |        |        |      |      |      |      |    |    |

|                       |                                                |                       |       |        |        |       |       |       |      |    |    |
|-----------------------|------------------------------------------------|-----------------------|-------|--------|--------|-------|-------|-------|------|----|----|
| Anthocyanins          | Cyanidin 3-O-glucoside                         | Pure compound         | -2.79 | 449.39 | 191.46 | 3.95  | 2.85  | 1.81  | 0.16 | 8  | 64 |
| Flavanols             | Epicatechin                                    | Green tea (extract)   | 1.37  | 290.27 | 110.37 | 1.62  | 2.66  | 1.40  | 0.11 | 8  | 80 |
|                       | Epicatechin                                    | Green tea (extract)   | 1.37  | 290.27 | 110.37 | 1.62  | 2.66  | 1.65  | NA   | 20 | 79 |
|                       | Epicatechin gallate                            | Green tea (extract)   | 2.54  | 442.38 | 177.13 | 1.59  | 3.06  | 1.20  | 0.14 | 8  | 80 |
|                       | Epicatechin gallate                            | Green tea (extract)   | 2.54  | 442.38 | 177.13 | 1.59  | 3.06  | 1.53  | NA   | 20 | 79 |
|                       | Epigallocatechin                               | Green tea (extract)   | 1.08  | 306.27 | 130.6  | 1.65  | 2.46  | 1.30  | 0.11 | 8  | 80 |
|                       | Epigallocatechin                               | Green tea (extract)   | 1.08  | 306.27 | 130.6  | 1.65  | 2.46  | 1.64  | NA   | 20 | 79 |
|                       | Epigallocatechin gallate                       | Green tea (extract)   | 2.25  | 458.38 | 197.36 | 1.58  | 2.83  | 0.90  | 0.07 | 8  | 80 |
|                       | Epigallocatechin gallate                       | Green tea (extract)   | 2.25  | 458.38 | 197.36 | 1.58  | 2.83  | 1.36  | NA   | 20 | 79 |
| Hydroxy-benzoic acids | Ellagic acid                                   | Pomegranate (extract) | 0.94  | 302.19 | 141.33 | 1.67  | 2.25  | 1.97  | 0.41 | 20 | 68 |
|                       | Ellagic acid                                   | Pomegranate (extract) | 0.94  | 302.19 | 141.33 | 1.67  | 2.25  | 1.42  | 0.24 | 20 | 68 |
| Stilbenes             | Resveratrol                                    | Pure compound         | 2.99  | 228.25 | 60.68  | 1.63  | 2.94  | 1.58  | 0.27 | 15 | 58 |
|                       | trans-Resveratrol                              | Pure compound         | 2.99  | 228.25 | 60.68  | 1.63  | 2.94  | 1.12  | 0.26 | 12 | 81 |
|                       | cis-Piceid (cis-Resveratrol 3-O-glucoside)     | Pure compound         | 1.2   | 390.39 | 139.84 | 1.63  | 3.23  | 1.00  | 0.06 | 10 | 83 |
|                       | trans-Piceid (trans-Resveratrol 3-O-glucoside) | Pure compound         | 1.2   | 390.39 | 139.84 | 1.63  | 3.23  | 0.88  | 0.08 | 10 | 83 |
| Carotenoids           | $\beta$ -Carotene                              | Pure compound         | 9.843 | 536.89 | 0      | 15.27 | 15.45 | 36.00 | NA   | 12 | 91 |

|          |                   |               |       |        |        |       |       |       |      |    |    |
|----------|-------------------|---------------|-------|--------|--------|-------|-------|-------|------|----|----|
|          | $\beta$ -Carotene | Pure compound | 9.843 | 536.89 | 0      | 15.27 | 15.45 | 36.00 | NA   | 12 | 91 |
|          | $\beta$ -Carotene | Pure compound | 9.843 | 536.89 | 0      | 15.27 | 15.45 | 35.00 | NA   | 12 | 91 |
|          | Crocetin          | Pure compound | 4.63  | 328.41 | 74.6   | 2.01  | 3.98  | 4.8   | 0.32 | 10 | 90 |
|          | Crocetin          | Pure compound | 4.63  | 328.41 | 74.6   | 2.01  | 3.98  | 4     | 0.28 | 10 | 90 |
|          | Crocetin          | Pure compound | 4.63  | 328.41 | 74.6   | 2.01  | 3.98  | 4.6   | 0.32 | 10 | 90 |
|          | Lutein            | Pure compound | 9.307 | 568.89 | 40.46  | 11.27 | 13.23 | 36.8  | 4.15 | 18 | 61 |
| Vitamins | Ascorbic acid     | Pure compound | -1.4  | 176.12 | 107.22 | 2.53  | 1.72  | 3.00  | NA   | 9  | 63 |
|          | Calcitriol        | Pure compound | 5.56  | 416.65 | 60.68  | 2.48  | 6.25  | 4.00  | NA   | 10 | 60 |
|          | Phenprocoumon     | Pure compound | 4.09  | 280.32 | 50.44  | 1.83  | 3.89  | 2.25  | NA   | 24 | 70 |
|          | Phylloquinone     | Pure compound | 8.803 | 450.71 | 34.14  | 8.64  | 8.62  | 8.8   | 0.38 | 20 | 86 |

\* calculated using the Molinspiration Chemoinformatics calculator

\*\* calculated from the predictive model

# collected from the literature

**S3 Table. The PHv\_fasted dataset for validation of the predictive model.** All compounds were taken as solid form.

| Pharmaceutical compound | LogP* | M <sub>r</sub> * | PSA* (Å <sup>2</sup> ) | Predicted T <sub>max</sub> _LogP** (h) | Predicted T <sub>max</sub> _PSA** (h) | Measured T <sub>max</sub> #(h) |      |    | Reference# |
|-------------------------|-------|------------------|------------------------|----------------------------------------|---------------------------------------|--------------------------------|------|----|------------|
|                         |       |                  |                        |                                        |                                       | Mean                           | SE   | N  |            |
| Nadolol                 | 1.15  | 309.41           | 81.95                  | 1.64                                   | 3.50                                  | 3.00                           | 1    | 10 | 123        |
| Nifedipine              | 3.07  | 346.34           | 110.46                 | 1.64                                   | 3.33                                  | 2.80                           | 0.5  | 20 | 101        |
| Odanacetib              | 3.96  | 525.57           | 99.06                  | 1.80                                   | 7.38                                  | 3.00                           | 1    | 44 | 136        |
| Tramadol                | 3.18  | 263.38           | 32.70                  | 1.65                                   | 4.11                                  | 2.20                           | 0.8  | 20 | 96         |
| Amisulpride             | 1.56  | 369.49           | 101.74                 | 1.60                                   | 3.88                                  | 2.30                           | 1.9  | 8  | 111        |
| Levofloxacin            | -0.26 | 361.37           | 75.01                  | 1.96                                   | 4.53                                  | 1.84                           | 0    | 12 | 139        |
| Mirodenafil             | 3.23  | 531.68           | 120.77                 | 1.66                                   | 6.50                                  | 3.25                           | 2.75 | 6  | 124        |
| Talinolol               | 3.36  | 363.50           | 86.11                  | 1.68                                   | 4.23                                  | 2.10                           | 0.81 | 14 | 142        |
| Aleglitazar             | 4.73  | 437.52           | 81.80                  | 2.05                                   | 5.86                                  | 3.00                           | 0    | 6  | 137        |
| Mitiglinide             | 3.37  | 315.41           | 57.61                  | 1.68                                   | 4.26                                  | 0.36                           | 0.16 | 8  | 144        |
| Risperidone             | 2.96  | 410.49           | 64.17                  | 1.62                                   | 5.95                                  | 1.20                           | 0.7  | 25 | 125        |
| Sonidegib               | 5.89  | 485.51           | 63.70                  | 2.72                                   | 8.05                                  | 3.00                           | 1    | 6  | 147        |
| Imidafenacin            | 2.34  | 319.01           | 60.92                  | 1.58                                   | 4.22                                  | 1.50                           | 0.45 | 6  | 127        |
| Olanzapine              | 3.47  | 312.44           | 35.16                  | 1.70                                   | 4.92                                  | 4.92                           | 1.8  | 6  | 112        |
| Imatinib                | 3.89  | 493.62           | 86.28                  | 1.78                                   | 7.10                                  | 3.63                           | 1.2  | 30 | 129        |
| Arbidol                 | 4.86  | 477.42           | 54.71                  | 2.10                                   | 8.30                                  | 0.75                           | 0.75 | 20 | 119        |
| Ruxolitinib             | 1.83  | 306.37           | 83.19                  | 1.59                                   | 3.43                                  | 1.00                           | 0.5  | 16 | 134        |
| Risperidone             | 2.96  | 410.49           | 64.17                  | 1.62                                   | 5.95                                  | 1.00                           | 0.31 | 10 | 120        |
| Ritonavir               | 6.93  | 720.96           | 145.78                 | 3.81                                   | 11.63                                 | 4.20                           | 2.2  | 10 | 135        |
| Rosuvastatin            | 2.11  | 481.55           | 140.92                 | 1.58                                   | 4.62                                  | 2.46                           | 0.65 | 12 | 117        |
| Capravirine             | 4.45  | 451.38           | 83.05                  | 1.95                                   | 6.14                                  | 3.00                           | 1.5  | 5  | 99         |
| Proguanil               | 2.05  | 253.74           | 83.79                  | 1.58                                   | 2.77                                  | 2.80                           | 1.2  | 15 | 135        |
| CH 4987655              | 3.22  | 565.29           | 100.12                 | 1.66                                   | 8.59                                  | 1.00                           | 1    | 40 | 115        |
| RO 5068760              | 4.11  | 647.44           | 128.20                 | 1.84                                   | 9.80                                  | 2.00                           | 2    | 6  | 114        |
| Tinidazole              | -0.06 | 247.28           | 97.79                  | 1.89                                   | 2.45                                  | 2.15                           | 0.47 | 50 | 100        |
| Pantoprazole            | 1.95  | 383.38           | 86.35                  | 1.58                                   | 4.57                                  | 2.27                           | 0.52 | 28 | 103        |
| Moxifloxacin            | 0.39  | 401.44           | 83.80                  | 1.77                                   | 5.00                                  | 1.00                           | 1.5  | 16 | 116        |
| Tacrolimus              | 4.26  | 804.03           | 178.38                 | 1.88                                   | 12.90                                 | 1.37                           | 0.64 | 15 | 97         |
| Ethionamide             | 1.46  | 166.25           | 38.92                  | 1.61                                   | 2.67                                  | 1.70                           | 0.87 | 16 | 92         |



|              |       |         |        |      |       |      |      |    |     |
|--------------|-------|---------|--------|------|-------|------|------|----|-----|
| Metopimazine | 2.73  | 445.61  | 85.41  | 1.60 | 5.90  | 0.87 | 0.5  | 6  | 110 |
| Sulfonamide  | -0.29 | 172.21  | 86.19  | 1.97 | 1.97  | 1.98 | 0.51 | 8  | 122 |
| Ketoconazole | 3.77  | 531.44  | 69.08  | 1.75 | 9.32  | 1.40 | 0.1  | 10 | 121 |
| Miconazole   | 5.72  | 416.14  | 27.06  | 2.59 | 7.89  | 2.60 | 0.3  | 12 | 121 |
| Nifedipine   | 3.07  | 346.34  | 110.46 | 1.64 | 3.33  | 1.00 | 0    | 10 | 126 |
| Spirolactone | 3.03  | 416.58  | 3.03   | 1.63 | 9.35  | 1.70 | 1    | 9  | 128 |
| Ciramadol    | 2.56  | 249.35  | 43.69  | 1.59 | 3.60  | 0.90 | 1    | 14 | 93  |
| Cyclosporin  | 3.61  | 1202.64 | 278.78 | 1.72 | 31.47 | 2.00 | 2    | 11 | 118 |
| S 3304       | 2.80  | 464.57  | 99.26  | 1.61 | 5.77  | 2.00 | 1    | 6  | 140 |
| MK 462       | 1.39  | 269.35  | 49.75  | 1.61 | 3.74  | 1.60 | 1.2  | 12 | 102 |
| Itraconazole | 5.32  | 705.65  | 104.73 | 2.34 | 14.58 | 3.90 | 1    | 28 | 95  |
| Indinavir    | 2.51  | 613.80  | 118.02 | 1.59 | 9.20  | 0.90 | 0.5  | 10 | 143 |
| Celecoxib    | 3.61  | 381.38  | 77.99  | 1.72 | 4.80  | 2.44 | 0.83 | 24 | 130 |
| Rifampin     | 2.62  | 822.95  | 220.16 | 1.60 | 10.39 | 2.18 | 1.44 | 14 | 132 |
| Topiramate   | 0.16  | 339.37  | 115.57 | 1.83 | 3.12  | 1.75 | 1.17 | 28 | 105 |
| Ethambutol   | 0.35  | 204.31  | 64.51  | 1.78 | 2.60  | 2.46 | 0.86 | 14 | 133 |
| Isoniazid    | -0.97 | 137.14  | 68.01  | 2.27 | 1.94  | 1.02 | 1.1  | 14 | 148 |
| Cilostazol   | 3.40  | 369.47  | 3.40   | 1.68 | 7.72  | 3.00 | 3    | 23 | 98  |
| Febuxostat   | 3.68  | 316.38  | 83.22  | 1.74 | 3.57  | 0.80 | 0.6  | 24 | 113 |
| Apixaban     | 1.78  | 459.51  | 110.77 | 1.59 | 5.22  | 3.00 | 3    | 43 | 108 |
| Ziprasidone  | 4.05  | 412.95  | 48.47  | 1.82 | 6.70  | 3.60 | 0.7  | 8  | 109 |
| Cefprozil    | -1.68 | 389.43  | 132.96 | 2.74 | 3.38  | 1.20 | 0.8  | 12 | 94  |
| Eprosartan   | 4.89  | 424.52  | 92.42  | 2.12 | 5.16  | 1.50 | 1.5  | 6  | 138 |
| Amoxicillin  | -1.35 | 365.41  | 132.86 | 2.50 | 3.07  | 1.86 | 0.3  | 16 | 106 |
| Ampicillin   | -0.87 | 349.41  | 112.73 | 2.22 | 3.32  | 1.49 | 0.5  | 16 | 106 |
| Pyrazinamide | -0.71 | 123.12  | 68.88  | 2.14 | 1.82  | 1.71 | 1.19 | 14 | 131 |
| Bosentan     | 4.16  | 551.63  | 145.67 | 1.85 | 5.91  | 3.50 | 4.5  | 16 | 104 |
| Telbivudine  | -1.43 | 242.23  | 104.56 | 2.55 | 2.29  | 3.00 | 3    | 24 | 145 |
| Tenoxicam    | 0.76  | 337.38  | 99.60  | 1.70 | 3.46  | 1.70 | 1.2  | 6  | 107 |
| Eltrombopag  | 5.12  | 442.48  | 116.82 | 2.23 | 4.67  | 3.50 | 2    | 25 | 151 |
| Fluconazole  | -0.12 | 306.28  | 81.66  | 1.91 | 3.47  | 3.08 | 0.79 | 12 | 146 |

\* calculated using the Molinspiration Chemoinformatics calculator

\*\* calculated from the predictive model

# collected from the literature

**S4 Table. The Pharmaceutical fed dataset for validation of the predictive model.** All compounds were taken as solid form.

| Pharmaceutical compound | LogP* | M <sub>r</sub> * | PSA* (Å <sup>2</sup> ) | Predicted T <sub>max</sub> _LogP** (h) | Predicted T <sub>max</sub> _PSA** (h) | Measured T <sub>max</sub> #(h) |      |    | Reference# |
|-------------------------|-------|------------------|------------------------|----------------------------------------|---------------------------------------|--------------------------------|------|----|------------|
|                         |       |                  |                        |                                        |                                       | Mean                           | SE   | N  |            |
| Odanacatib              | 3.96  | 525.57           | 99.06                  | 1.80                                   | 7.38                                  | 4                              | 1    | 44 | 136        |
| Amisulpride             | 1.56  | 369.49           | 101.74                 | 1.60                                   | 3.88                                  | 1.7                            | 0.6  | 8  | 111        |
| Mitiglinide             | 3.37  | 315.41           | 57.61                  | 1.68                                   | 4.26                                  | 1.97                           | 0.81 | 8  | 144        |
| Rosuvastatin            | 2.11  | 481.55           | 140.92                 | 1.58                                   | 4.62                                  | 4.28                           | 1.35 | 8  | 117        |
| Pantoprazole            | 1.95  | 383.38           | 86.35                  | 1.58                                   | 4.57                                  | 6.287                          | 4.41 | 28 | 103        |
| Moxifloxacin            | 0.39  | 401.44           | 83.80                  | 1.77                                   | 5.00                                  | 2.5                            | 1.5  | 16 | 116        |
| Tacrolimus              | 4.26  | 804.03           | 178.38                 | 1.88                                   | 12.90                                 | 6.47                           | 3.04 | 15 | 97         |
| Ethionamide             | 1.46  | 166.25           | 38.92                  | 1.61                                   | 2.67                                  | 2.6                            | 0.94 | 16 | 92         |
| Metopimazine            | 2.73  | 445.61           | 85.41                  | 1.60                                   | 5.90                                  | 1.5                            | 0.5  | 6  | 110        |
| Sulfonamide             | -0.29 | 172.21           | 86.19                  | 1.97                                   | 1.97                                  | 2.22                           | 1.07 | 8  | 122        |
| Ketoconazole            | 3.77  | 531.44           | 69.08                  | 1.75                                   | 9.32                                  | 2.3                            | 0.3  | 12 | 121        |
| Nifedipine              | 3.07  | 346.34           | 110.46                 | 1.64                                   | 3.33                                  | 3.5                            | 0.5  | 10 | 126        |
| Spirolactone            | 3.03  | 416.58           | 3.03                   | 1.63                                   | 9.35                                  | 1.4                            | 1.1  | 9  | 128        |
| Ciramadol               | 2.56  | 249.35           | 43.69                  | 1.59                                   | 3.60                                  | 2.1                            | 2.1  | 14 | 93         |
| S 3304                  | 2.80  | 464.57           | 99.26                  | 1.61                                   | 5.77                                  | 5                              | 1    | 6  | 140        |
| MK 462                  | 1.39  | 269.35           | 49.75                  | 1.61                                   | 3.74                                  | 2.9                            | 1.4  | 12 | 102        |
| Itraconazole            | 5.32  | 705.65           | 104.73                 | 2.34                                   | 14.58                                 | 4.5                            | 1.1  | 28 | 95         |
| Indinavir               | 2.51  | 613.80           | 118.02                 | 1.59                                   | 9.20                                  | 2.8                            | 1.9  | 16 | 143        |
| Celecoxib               | 3.61  | 381.38           | 77.99                  | 1.72                                   | 4.80                                  | 3.42                           | 1.28 | 24 | 130        |
| Rifampin                | 2.62  | 822.95           | 220.16                 | 1.60                                   | 10.39                                 | 4.43                           | 1.12 | 14 | 132        |
| Ethambutol              | 0.35  | 204.31           | 64.51                  | 1.78                                   | 2.60                                  | 3.21                           | 1.34 | 14 | 133        |
| Isoniazid               | -0.97 | 137.14           | 68.01                  | 2.27                                   | 1.94                                  | 1.93                           | 1.62 | 14 | 148        |
| Cilostazol              | 3.40  | 369.47           | 3.40                   | 1.68                                   | 7.72                                  | 3.5                            | 1.5  | 23 | 98         |
| Febuxostat              | 3.68  | 316.38           | 83.22                  | 1.74                                   | 3.57                                  | 1.9                            | 0.9  | 24 | 113        |
| Apixaban                | 1.78  | 459.51           | 110.77                 | 1.59                                   | 5.22                                  | 4                              | 5    | 43 | 108        |
| Ziprasidone             | 4.05  | 412.95           | 48.47                  | 1.82                                   | 6.70                                  | 4.5                            | 1.4  | 8  | 109        |
| Cefprozil               | -1.68 | 389.43           | 132.96                 | 2.74                                   | 3.38                                  | 2                              | 1.5  | 12 | 94         |
| Eprosartan              | 4.89  | 424.52           | 92.42                  | 2.12                                   | 5.16                                  | 3                              | 1.5  | 4  | 138        |
| Artemisinin             | 3.32  | 282.34           | 54.01                  | 1.67                                   | 3.82                                  | 1.78                           | 1.23 | 16 | 150        |

|              |       |        |        |      |       |      |      |    |     |
|--------------|-------|--------|--------|------|-------|------|------|----|-----|
| Amoxicillin  | -1.35 | 365.41 | 132.86 | 2.50 | 3.07  | 2.4  | 0.41 | 16 | 106 |
| Ampicillin   | -0.87 | 349.41 | 112.73 | 2.22 | 3.32  | 2.48 | 0.74 | 14 | 106 |
| Pyrazinamide | -0.71 | 123.12 | 68.88  | 2.14 | 1.82  | 3.09 | 1.75 | 16 | 131 |
| Bosentan     | 4.16  | 551.63 | 145.67 | 1.85 | 5.91  | 4    | 4    | 24 | 104 |
| Telbivudine  | -1.43 | 242.23 | 104.56 | 2.55 | 2.29  | 3    | 1    | 24 | 145 |
| Posaconazole | 4.33  | 700.79 | 115.72 | 1.91 | 13.24 | 5.5  | 1.76 | 20 | 149 |
| Tenoxicam    | 0.76  | 337.38 | 99.60  | 1.70 | 3.46  | 3.8  | 2    | 6  | 107 |
| Eltrombopag  | 5.12  | 442.48 | 116.82 | 2.23 | 4.67  | 4    | 8    | 25 | 151 |
| Fluconazole  | -0.12 | 306.28 | 81.66  | 1.91 | 3.47  | 3.5  | 1    | 12 | 146 |

\* calculated using the Molinspiration Chemoinformatics calculator

\*\* calculated from the predictive model

# collected from the literature
